# Supplementary material for: Conformational changes of DNA induced by a trans-azobenzene derivative via non-covalent interactions
Source: Royal Society of Chemistry journal article supplement (doi:10.1039/c8cp03836h), 2018-01-01
Supplement: c8cp03836h1.pdf [file c8cp03836h1.pdf]

Electronic Supplementary Information

## Conformational Changes of DNA Induced by *trans*-Azobenzene Derivative via Non-covalent Interactions

Hong Zhang,<sup>a</sup> Haohao Fu,<sup>a</sup> Xueguang Shao,<sup>abcd</sup> Christophe Chipot,<sup>efgh</sup>

Antonio Monari,<sup>h</sup> François Dehez<sup>\*eh</sup> and Wensheng Cai<sup>\*abd</sup>

<sup>a</sup> Research Center for Analytical Sciences, College of Chemistry, Nankai University, Tianjin 300071, China

<sup>b</sup> Tianjin Key Laboratory of Biosensing and Molecular Recognition, Tianjin 300071, China

<sup>c</sup> State Key Laboratory of Medicinal Chemical Biology, Tianjin 300071, China

<sup>d</sup> Collaborative Innovation Center of Chemical Science and Engineering, Tianjin, 300071, China

<sup>e</sup> Laboratoire International Associé Centre National de la Recherche Scientifique et University of Illinois at Urbana–Champaign, Unité Mixte de Recherche No. 7565, Université de Lorraine, B.P. 70239, 54506 Vandoeuvre–lès–Nancy cedex, France

<sup>f</sup> Theoretical and Computational Biophysics Group, Beckman Institute for Advanced Science and Technology, University of Illinois at Urbana–Champaign, Urbana, Illinois 61801, United States

<sup>g</sup> Department of Physics, University of Illinois at Urbana–Champaign, Urbana, Illinois 61801, United States

<sup>h</sup> Université de Lorraine and CNRS. LPCT UMR 7019 F-54000 Nancy, France

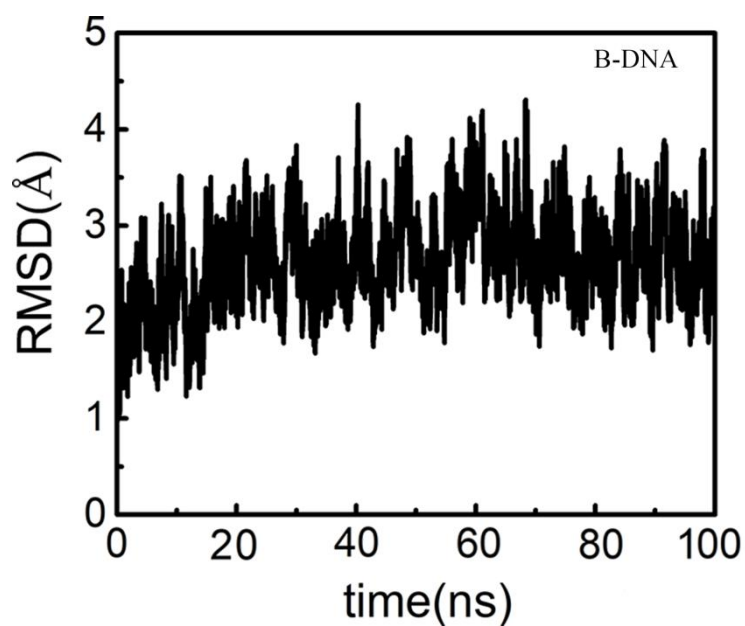

**Fig. S1** Root-mean-square deviation (RMSDs) of heavy atoms of DNA for the last 100 ns simulation, using the initial structure as reference structures (native DNA).

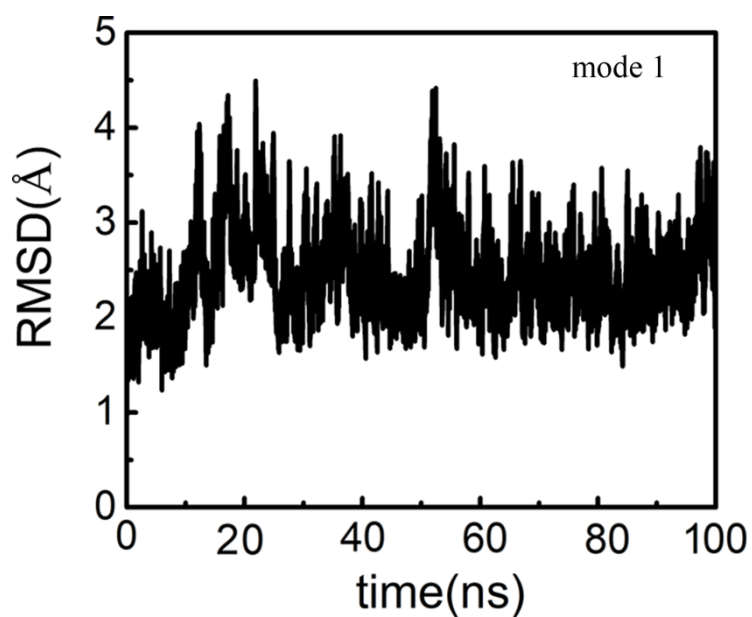

**Fig. S2** Root-mean-square deviation (RMSDs) of heavy atoms of DNA for the last 100 ns simulation, using the initial structure as reference structures (mode1: the planar aromatic rings of *trans*-azobenzene intercalating from the minor groove).

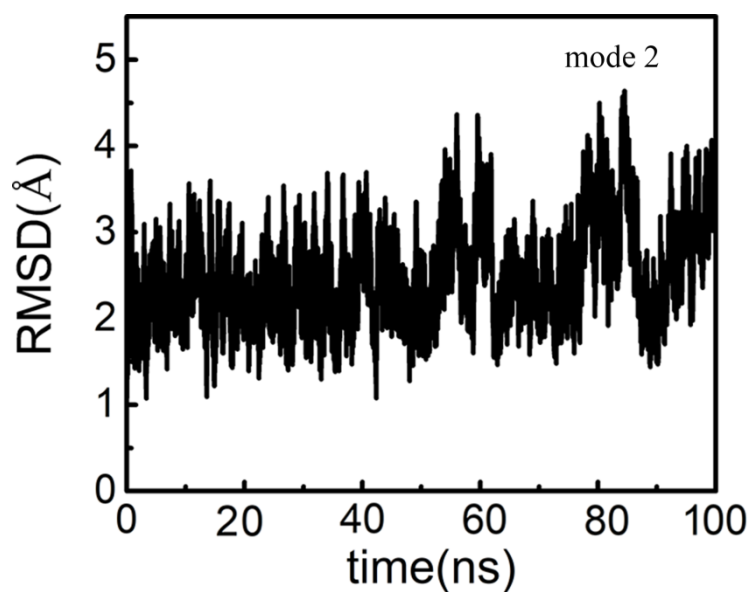

**Fig. S3** Root-mean-square deviation (RMSDs) of heavy atoms of DNA for the last 100 ns simulation, using the initial structure as reference structures (mode 2: the planar aromatic rings of *trans*-azobenzene intercalating from the major groove).

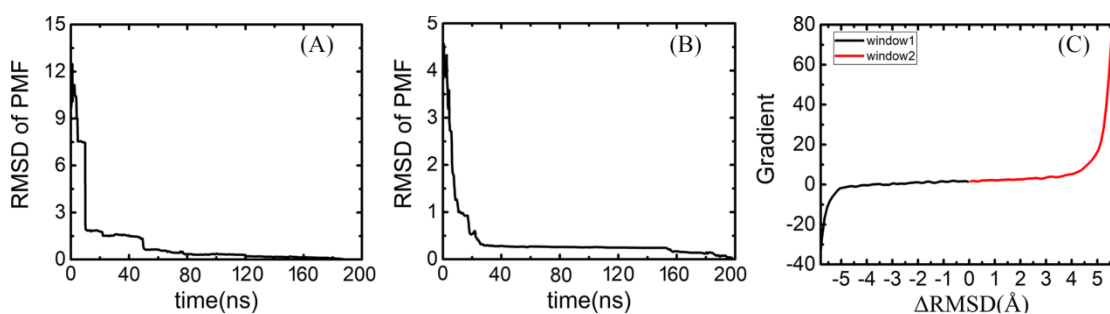

**Fig. S4** (A and B) Time evolution of the root-mean-square deviation (RMSD) over the PMF depicting B- to A-DNA transition without azobenzene. (C) The gradients of the free-energy calculations in two windows.

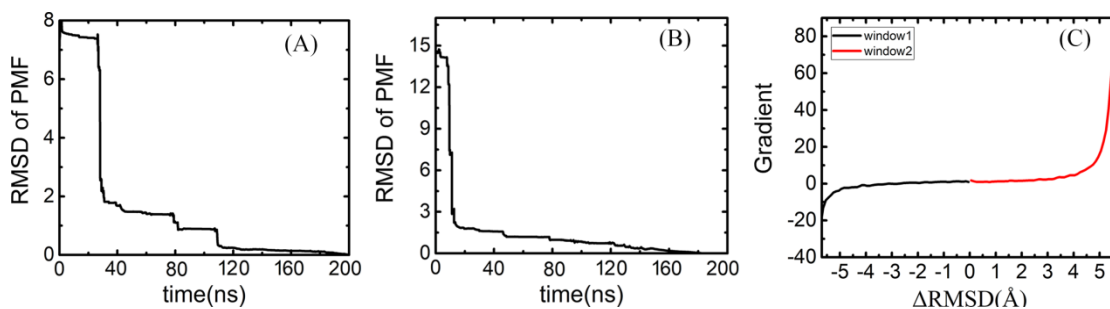

**Fig. S5** (A and B) Time evolution of the root-mean-square deviation (RMSD) over the PMF depicting B- to A-DNA transition with *trans*-azobenzene intercalating from minor groove (mode 1). (C) The gradients of the free-energy calculations in two windows.

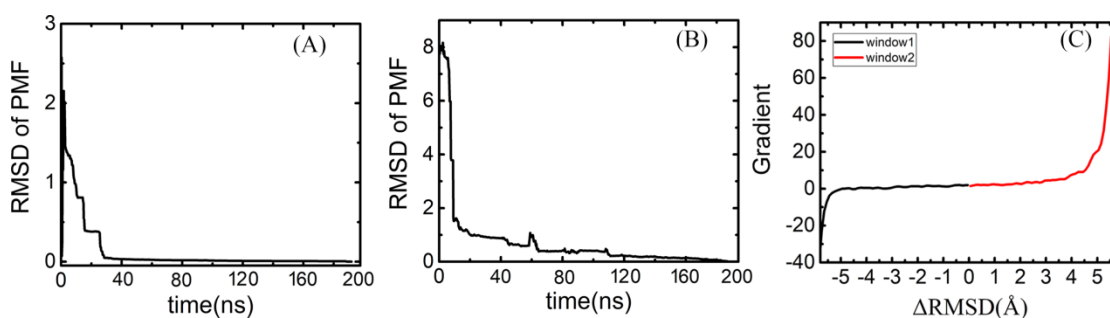

**Fig. S6** (A and B) Time evolution of the root-mean-square deviation (RMSD) over the PMF depicting B- to A-DNA transition with *trans*-azobenzene intercalating from major groove (mode 2). (C) The gradients of the free-energy calculations in two windows.

**Binding Modes of *cis*-azobenzene.** To investigate the binding mode of *cis*-azobenzene, two preliminary simulations were performed. The results of the two 40-ns MD simulations for the DNA-azobenzene (*cis* form) complexes, wherein the ligand intercalates from the minor (mode 1) and the major (mode 2) grooves,

demonstrate that both of them cannot exist. As shown in Fig. S1A, for mode 1, the head benzene ring of *cis*-azobenzene separated from the nearest-neighboring base pairs in 40-ns MD simulations, while the azobenzene can stay in the minor groove. Additional 300-ns MD simulations show that minor-groove binding pattern is persistent. For mode 2, the azobenzene deviated from the base pairs and attached to DNA without specific binding site in 40-ns simulations. Compared with the planar *trans* form, non-planar *cis* form has a larger molecular size, acting as a steric hindrance to intercalate between two adjacent base pairs. Four main parameters are chosen to describe the conformational changes of DNA computed over the last 100-ns trajectories in the additional 300-ns simulations. As shown in Fig. S2, there are no appreciable changes compared with native DNA when combined with *cis*-azobenzene. It can be, therefore, inferred that *cis*-azobenzene can bind with DNA in minor groove, while there is no significant effect on the conformational changes of DNA.

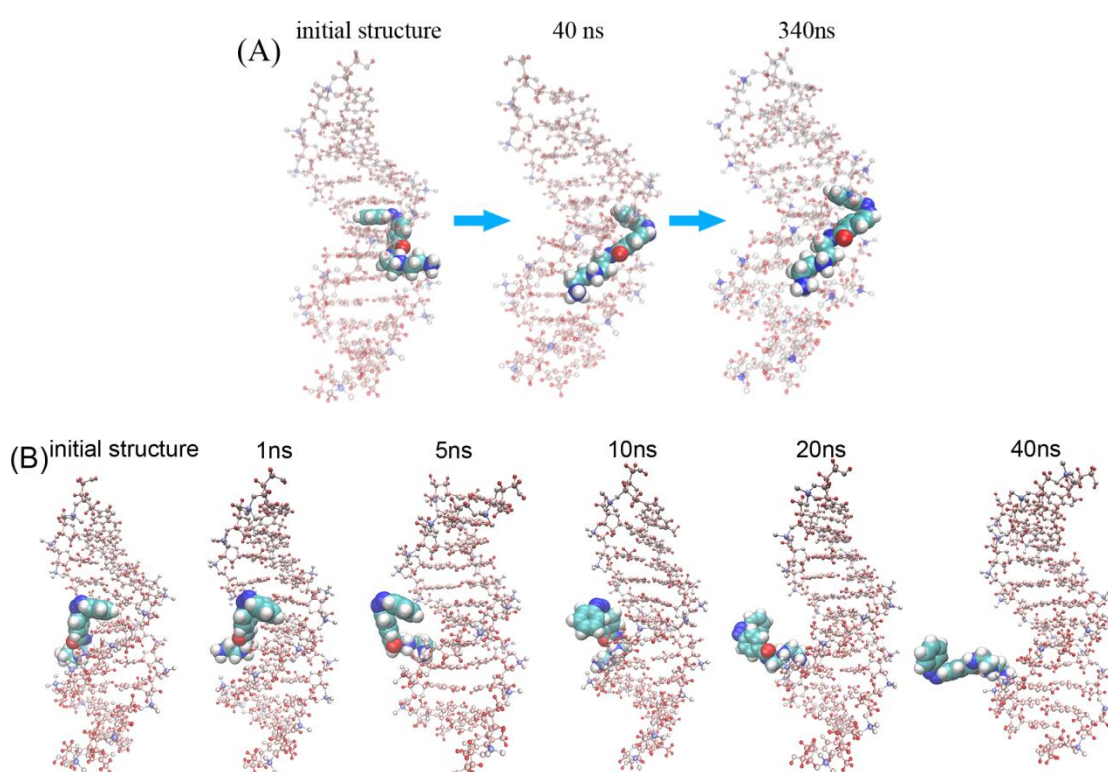

**Fig. S7** MD simulations for two possible binding modes of *cis*-azobenzene intercalating into DNA. (A) Milestones of the structural changes of mode 1 (the head benzene ring of *cis*-azobenzene intercalates from the minor groove, leaving its cationic tail located in the minor groove) obtained from an MD simulation over a 340 ns period. (B) Milestones of the structural changes of mode 2 (the head benzene ring of *cis*-azobenzene intercalates from the major groove, leaving its cationic tail located in the major groove) obtained from a 40-ns MD simulation.

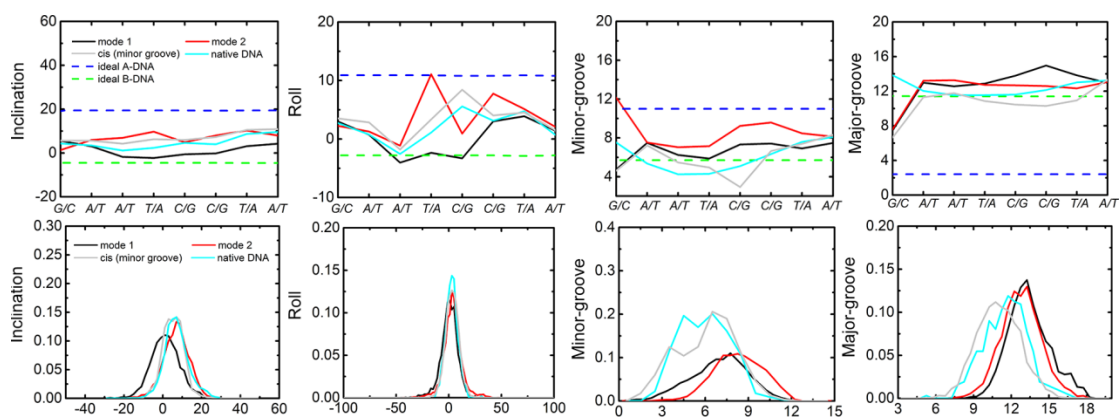

**Fig. S8** Average values and populations of main parameters of DNA computed over the last 100 ns simulations for the minor-groove binding mode of the DNA-*cis*-azobenzene complexes.

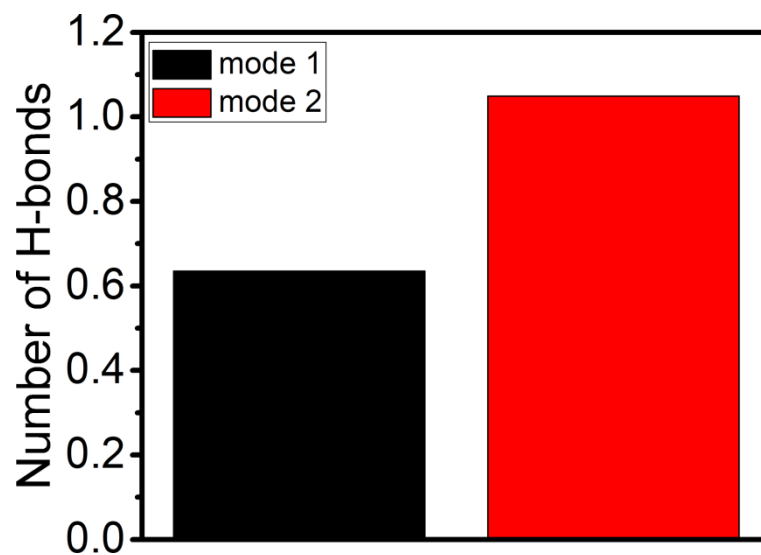

**Fig. S9** Average values of the number of H-bonds between the DNA and *trans*-azobenzene for different binding mode. (mode 1: intercalating the planar aromatic rings from the minor groove, mode 2: intercalating the planar aromatic rings from the major groove)
